# Supplementary material for: Transcriptional Differences in Lipid-Metabolizing Enzymes in Murine Sebocytes Derived from Sebaceous Glands of the Skin and Preputial Glands
Source: MDPI journal article supplement (doi:10.3390/ijms222111631), 2021-10-27
Supplement: s1 [file ijms-1429715-supplementary.pdf › ijms-1429715-supplementary.pdf]

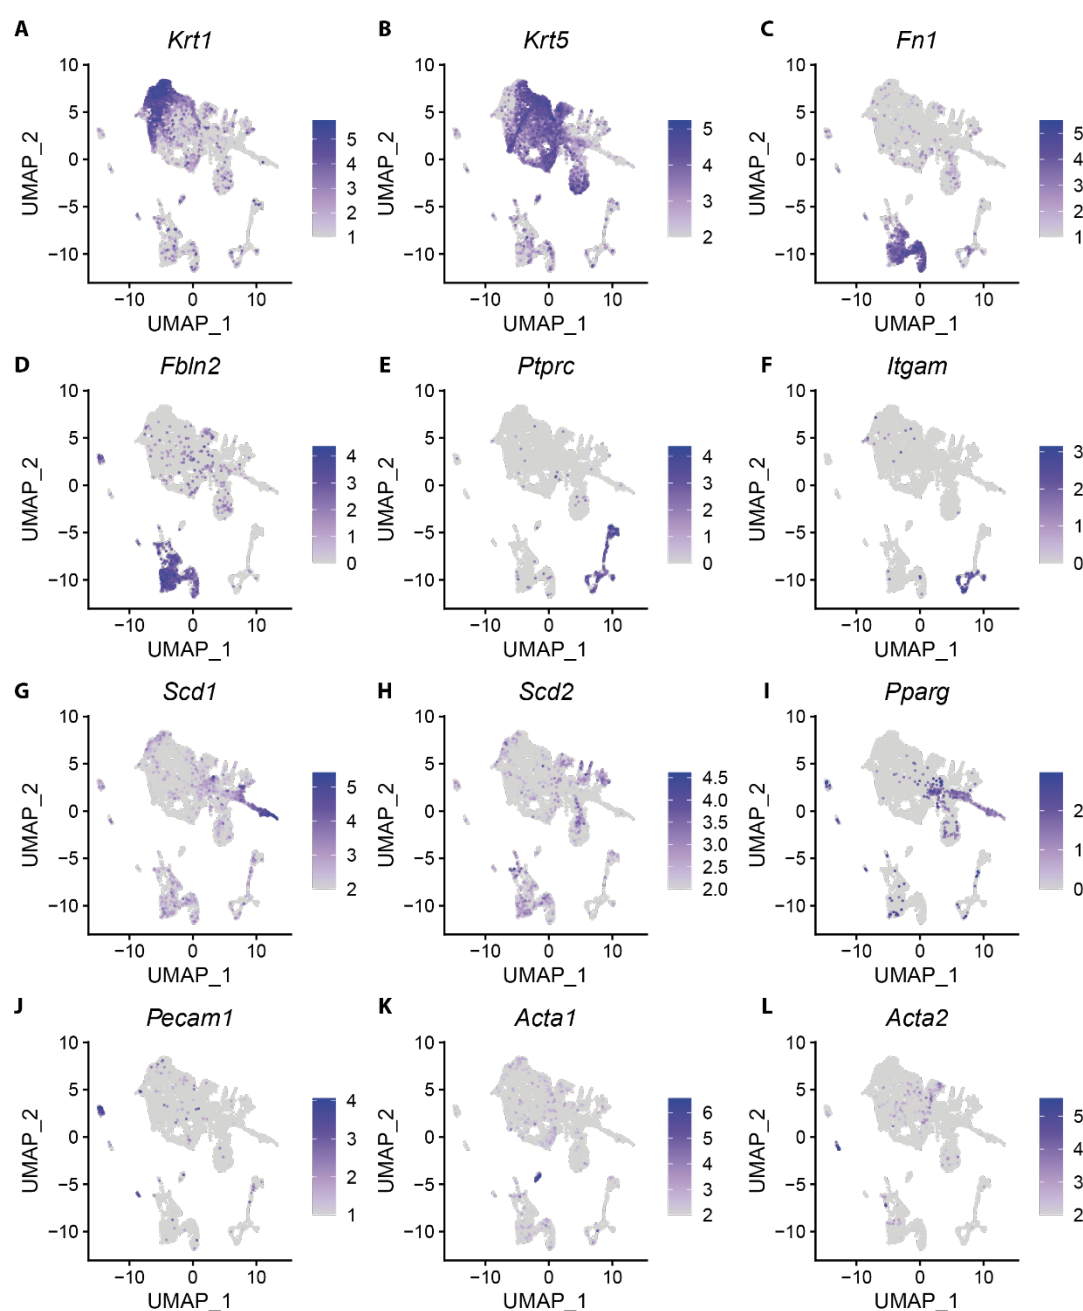

**Figure S1. Cell Population definition based on clustermarker.** Cell populations were identified as keratinocytes by (A) keratin 1 (*Krt1*) and (B) keratin 5 (*Krt5*), fibroblasts by (C) fibronectin (*Fn1*) and (D) fibulin-2 (*Fbln2*), immune cells by (E) CD45 (*Ptpcr*) and (F) CD11b (*Itgam*), sebocytes by (G) stearyl-CoA desaturase-1 (*Scd1*), (H) stearyl-CoA desaturase-2 and (I) peroxisome proliferator activated receptor gamma (*Pparg*), endothelial cells by (J) platelet and endothelial cell adhesion molecule 1 (*Pecam1*), muscle cells by (K) actin alpha 1 (*Acta1*) and smooth muscle cells by (L) actin alpha 2 (*Acta2*). In Feature Plots the normal log expression of the respective gene is mapped on the UMAP-Plot

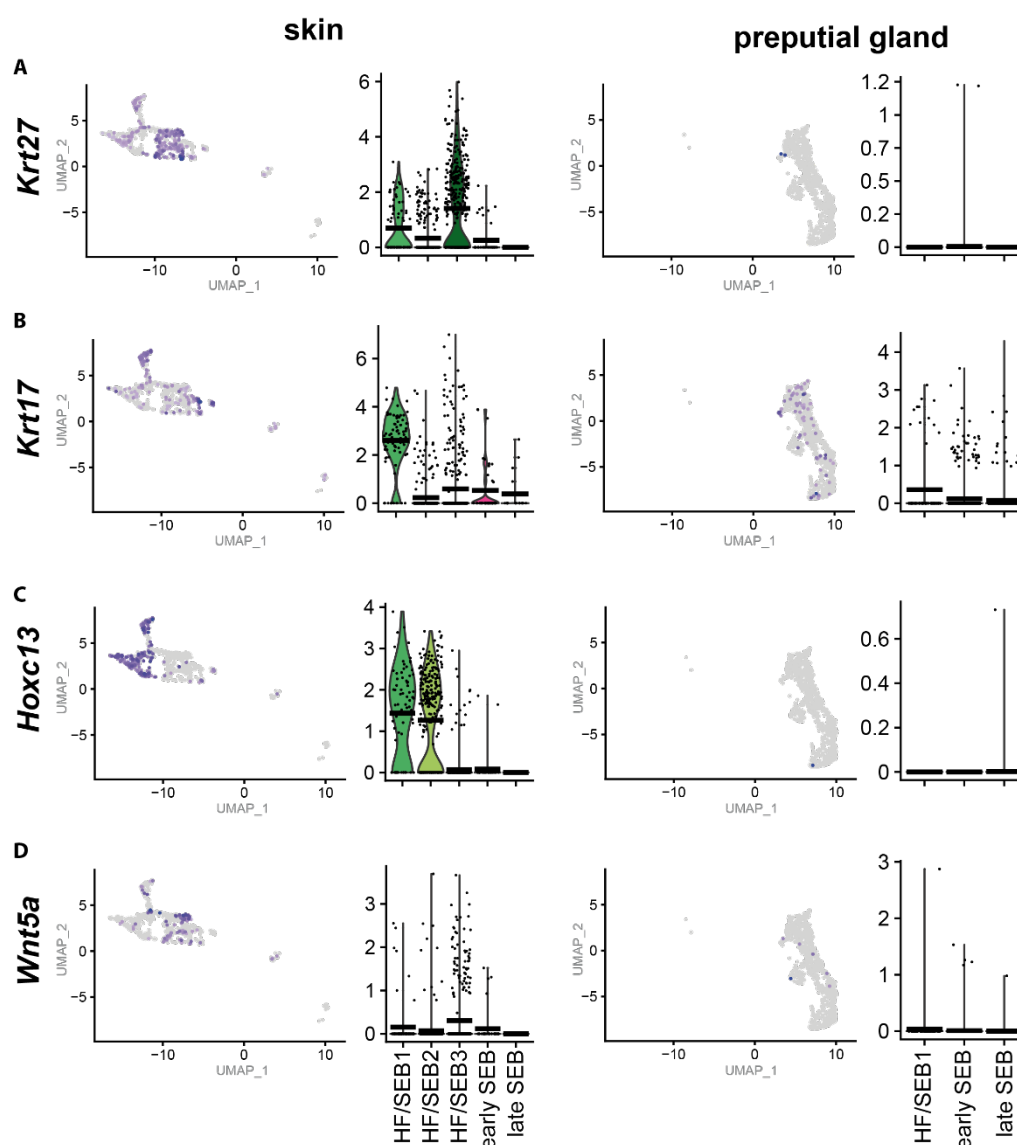

**Figure S2. HF-associated gene expression in SEB.** Featureplot and violin plot showing gene expression levels of HF-associated genes (A) keratin 27 (*Krt27*), (B) keratin 17 (*Krt17*), (C) homeobox c13 (*Hoxc13*) and (D) Wnt family member 5A (*Wnt5a*). Left panel showing sSEB, right panel showing pSEB. Violin-plots show gene expression levels and crossbar of violin-plots depicts mean expression value. Vertical lines show maximum expression. Width of violins represents the frequency of cells at the corresponding expression levels. In Feature Plots the normal log expression of the respective gene is mapped on the UMAP-Plot

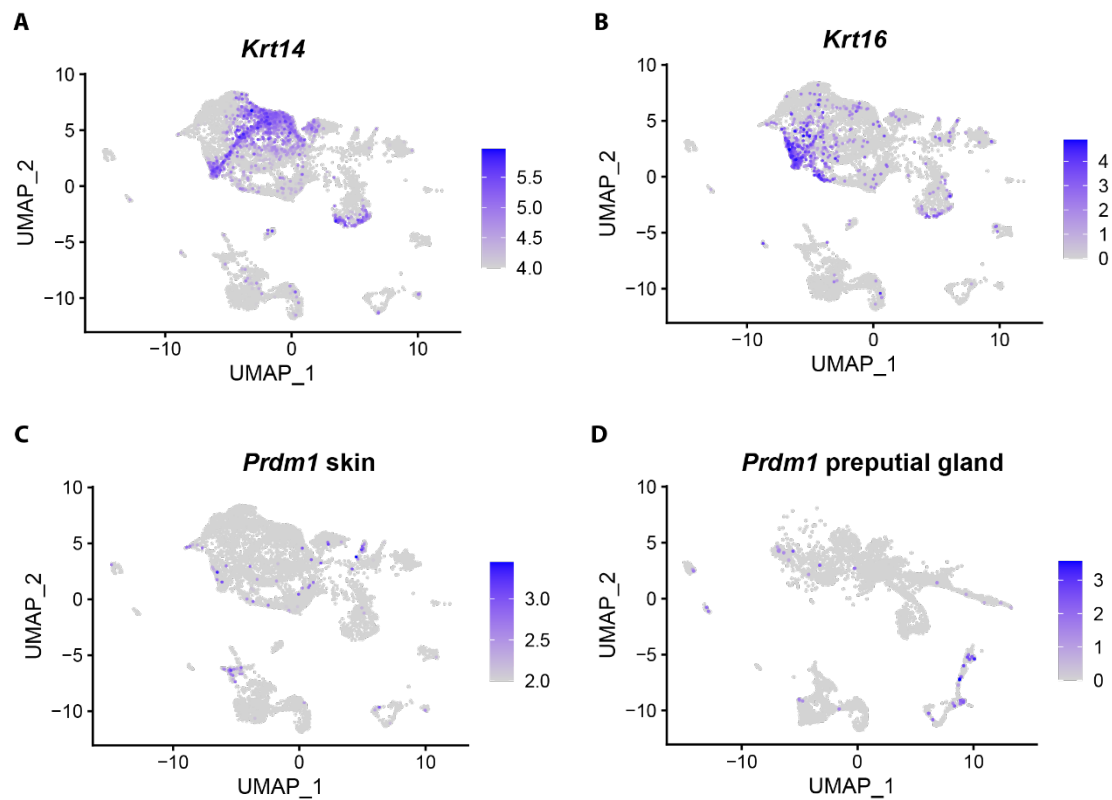

**Figure S3. HF/Diff KC cluster marker and Blimp1 expression.** Featureplots showing (A) keratin 14 (*Krt14*), (B) keratin 16 (*Krt16*) expression in skin. *Blimp1* (*Prdm1*) expression is shown for (C) skin and (D) preputial gland samples. In Feature 19 Plots the normal log expression of the respective gene is mapped on the UMAP-Plot
